# Supplementary material for: The Photoprotective Protein PsbS from Green Microalga Lobosphaera incisa: The Amino Acid Sequence, 3D Structure and Probable pH-Sensitive Residues
Source: MDPI journal article supplement (doi:10.3390/ijms242015060), 2023-10-11
Supplement: s1 [file s1]

**The photoprotective protein PsbS from green microalga *Lobosphaera incisa*: the amino acid sequence, 3D structure and probable pH-sensitive residues.**

Vasily V. Ptushenko<sup>1,2,\*</sup>, Dmitry D. Knorre<sup>3</sup>, Elena S. Glagoleva<sup>1,4</sup>

Supplementary Materials

**Table S1.** The CDS of the gene encoding PsbS (GenBank accession number OR604507).

```
>L.incisa-PsbS, CDS
ATGCAGACAAGTCCGTTTACAACCAGCCGAGCAGCCTATCGGCCAAATCAAACGTGGCC
CAGAGACTGGCAGCCCCCTCTGCGACCGGCAGTCGTCCACACAGGATGCGCCTGGCGCCG
ACCGCTGCCCTGAAGAGCAAGGTCAAGTACGACCCAGCGCCAAGACAGTTGACAGCCCT
GTATCAGCTTTCACACGACGCCGTGAGGTTTTCTGTTGGGCAGAACCGCTATGGGTGGCTTC
CTGGCAGCGGTGATTGGCGAGCTATTGACCGGCAAGGGCCCCATCGGCCAGCTGAGCCGTG
GAGCTTGGTGTGGACCCCTGGCCTCATCAACATCTTCTTCTGGGTCTCGTCGCCGTCAAC
TTCGTGACTGCAGTGTTCCTCCCGCAGCCCTACCTTCAGCGAGTCCAACCAGCAGGACGTG
CGCAAGCGCCCGTCAGGCCCATCCAGAAGCCTCAGAAGACCAGCGCAGCAGACCGACCT
GACCGCTTCTTCGGCACATCTAGCCAGTTTGGCTTCACGAAGAAGAACGAGCTGTTTGTG
GGCCGCACTGCCATGATTGGCTTCGCCTCCGCCCTCATCGGCGAGAAGCTGACAGGCGGC
AAGGGCCCCCTTGGGCCAGCTCGGCGTGCCGCTCGGTTTGGAGCTCAACCCACCTACGGA
TGGGTGGCCTCGCAGTCTGGGTGGGCTTCTTCTAGTCGCTGCAATTGGCTACGGCAAC
TTTGGCCAGCAGGAGGTGATGAGGAGATCTACTAG
```

**Table S2.** The sequence of contig containing these fragments of the gene encoding (GenBank accession number OR604506).

```
> Li925_1
CTCCCCACAAGGTACAAAACGATCCTTCCCTTAGCATTCATACAAGTGTAATATGCATA
CTGACAATGAAGGGTCAGCTGTTTGTACCGGTACACACAATAGGTCTGTTGTGCTTTTACA
CTATTTTACCTTGTGAAGGTGATTAGCAGTTGGTTGTGCAAGTGTACAAGAAGCAATGGT
GTGGAGAAAAGTGCAAACTCTGGGTTGACCAGATGTGTGAGTATGTTTGTGCTGAGATATGCC
ATTCTGTTGGACCCGCTTTTACAGGTGCTTACAGTGTGACAACAGCAGACCACTCCTATA
GCACGGTAAGAGTGTGACTTCTTACAGACTACCATCTTCGTCACTCACCATCTCTCCA
CAAATACTACTTACTGGCAATGGACACATATGACTTCGAAGCTGCATATACACAGACTA
AACTTGACAGCAGCTTACTGACAACATCGTACATGACCGTACAAGTTGTTTCGACATCAG
TTCTCACTGTCACTGTATACTCAGCGTCTTATAATTCAAGCTGCCCTCATGGCCTCAT
GGCATCAACATTGAACCTTGCAGTGTTTAAATCGAGCTAGTAGATCTCCTCATCACCCCTC
CTGCTGGCCAAAGTTGCCGTAGCCAATTGCAGCGACTGCAGTGTACACGCACGACCCAAT
AAGCGACAGCAAGTTGCAAAATTGAATTCATGACGGAATCACTTCCGATTTCCGTATG
GAAATCACAGACACAACCAGGCAAAGAGAGATTGAGCGATGGGCTGCACCACCTCAAAG
CAAGCAAGCCATTACAGCTTTTCACTCTCACCAGGAAGGCCACCCAGACTGCGAGG
CCAACCCATCCGTAGGTGGGGTTGAGCTCCAAACCGAGCGGCACGCCGAGCTGGCCCAAG
GGGCCCTTGCCGCTGTGAGCTTCTCGCCGATGAGGGCGGAGGCCAAGCCAATCATGGCA
GTGCGGCCCAACAACAGCTCGTCTTCTTCTGTAAGCCAACTGGCTAGATGTGCCGAAG
AAGCGCTGCGACACAGACAGGGTTGAGTGAGAACCAGCAATGAGTATGTGATTATACTGAG
CAACGGCAGTCAAGCCCTTCAACAACAAGGACCAGCACAAGACAGACTAGTATGAAGTAG
TTTGCATGTTTAAAGATTACCAAGATATCACCAAGTAAGAGACATTACAAGCAGGTAG
CACTAACCATCAGGGCACAGCTGGCTGTAGGGCACCTGCACCCTAGCCACTGTGGACACA
TCCACAACCTCGATTATGTTAGGGTTGTGCGTGACCGACCAAGTACTCACGTCAGGTCGGT
CTGCTGCGCTGGTCTTCTGAGGCTTCTGGATGGGGCCTGACGGGCGCTTGCGCACGTCCT
GCTGGTTGGACTCGCTGAAGGTAGGGCTGCCGGGGAACAGTGCAGTCACGAAGTTGACGG
CGACGAGACCCAGGAAGAAGATGTTGATGAGGCCAGGGTCCACACCAAGCTCCAGGCTCA
GCTGGCCGATGGGGCCCTTGCCGGTCAATAGCTGCAGGACAGCCAGGCCAACAGTCAGCT
TTGTGTGACAACAACAACAAGCACTGCTGGTAACTGACAGCAACTTGGTGTAAACAAAAG
GCCTATTGCTGGCTTTTACACAAGGCTCCTGAAGGTAGCTAACTATGTTCTTCAAGGTA
AGGTTTCGTAGATGAACTGCACCAGCACTGAAAAAGATTTGAGGCAAATCGAAAGCTTATA
AGCATAAATGACCAACGGTTCCAACCGCCCTTACCTCGCCAATCACCGCTGCCAGGAAGC
CACCCATAGCGGTTCTGCCCACGAAAACCTCACGGCGTCTGTGAAAGCTGATACAGGGC
TGTCAACTGTCTTGGCGCTGGGGTCGTACTTGACCTGAGCACATCAGATCGGCAACGGTT
GTAAGTAAGCAAGCCCGTAACGTCAGGGTGCACTTGCTGGTGTGGCAAGCAGGATCCCAA
CTCGCACTGGCGACAGCTACGTCGATGGACATGCTGCAGGGTTTTGTACCTACGACCCGA
CTTCCCAACCCAGATCAAAACCCACGTCGCCAACGAACGACTCAAGTAAGCTATGGATAG
```

TGAGTTCACGCCCTGTCCACTCCTATACAAGCGGGAAGGCCGATACAGCCACGTCTTGCT  
ACCTGCTTGGGCCCCGCTCGAAGTACGGCATGTACTGACCTTGCTCTTCAGGGCAGCGGTC  
GGCGCCAGGCGCATCCTGTGTGGGACGACTGCCGGTCGCAGAGGGGCTGCCAGTCTCTGG  
GCCACGTTTGATTTGGCCGATAGGCTGCTGCGGCTGGTTGTGAACGGACTTGTCTGCATA  
AGAGCCATCGTCTGCATTGCTCTAGTAGCCGTTTGATCTGTAGGTTATGTCAGTGCGTCG  
AGGATGGCAGTTGGTTGTATGTATGCGTTGAGTATGTTTCAGCTGGTTTGTCTGAAGGCTG  
CTTGTTTTGGGGGAGACTGTCAGCGGCTCTTTCAGGGGCTTCGCGCAAGGGTCAATCCCCA  
AGGGTTTGCCAGGAAGTGACGTGGGCTCCTACCAGTGGTTCGAAGGAGTTGTTTAGAAGGG  
GTGCTGAAAAATGCACGTAAATGTCGAGGTTGCGCCCAGCAGCCAGTTGAGCGGAACCTGG  
CGAACTGGTTCAGCCTCTCCCAAGTACTGGGACAGTCGGTTGATGTCAACATCGCATGGG  
TCTGTGCGCGATCAGGACTGCATGGCACCTGAAGGCCCTGTTTCTGGCATGCCAAGTGG  
GGCACGGGAACCAACATGCCACAGTGTATGCTTGTGGGCAGCTGGTTCGTGGTGCGCCTGG  
CCTGTTGATCCTGGCAGTTTGACCTGTGCGCCCCTAACAGCATGCAACGGCTGAGGGCGA  
AGGGCGAACGATCCTCATTAGCCCTCAAGCACATGCTGTACTAAGGACTGTACGGACCTT  
AAAGGACTGGTACGTCCCTTGCAGCATGTGTGCGATCGCGTGTGATGCATGGGAAGCACGC  
TTGTGATGGTGGTGGGGCGGCAGCCGGCATAACCATCCGCAAGCAAGCATATGAAGTCTAT  
CTTCTTAGTTCTTATAGGTTACAGCTAGAGTACTGACACACATAACAACGTGTCACTAGCT  
GTTTGTGTTCTGCTGGCATGCTTGCTTCGCATGGAACCCGAACGGCCCAACCCTTTTATT  
GCGAGAATGCGAGCACTGCTGGGTCCAAACACATCTATAAACTTGCTGTCAATTTTACAC  
ACAGAAATGGAGCTAAGTCTGAACTTTTGGAGCACGACAAACCACAACCAAAACCTTGACA  
TTCAATGCTCAATACTAGTCAATGCCAGCTGACAGGGCTCGGCAGCGCGAACTCATACAT  
TTATTTGCCGTATACAGCCTACTTGTCATATCACTGTCAGTTAACGACGGCTGTGCACTC  
TTTCAAGGACAACAAAGGCACCTTTGCCACTTGCCAGAAAGTGTACACAGCCAACCGCGAT  
GGCGCTAGCTGCAAATCTGCTGCCCCGATGCTTGCCGATCATCCGGTGGTCATGCGATGTC  
AGGGTGGAGCAAGCAAGTAGCACTGGGCTACAT
